# Supplementary material for: A randomized, placebo‐controlled trial of cenicriviroc for treatment of nonalcoholic steatohepatitis with fibrosis
Source: PubMed Central journal article supplement — Hepatology. 2018 Jan 29;67(5):1754–67. doi: 10.1002/hep.29477 (PMC5947654; doi:10.1002/hep.29477), 2018-01-29
Supplement: HEP-67-1754-s001.pdf [file HEP-67-1754-s001.pdf]

## Supplementary Appendix

### Table of Contents

#### I. List of Investigators

#### II. Supplementary Methods: Study Objectives

#### III. Supplementary Figures

Figure S1. CENTAUR Study Efficacy End Points

Figure S2. Planned Step-Down Approach Used for the Statistical Analysis of the CENTAUR Study Efficacy End Points

Figure S3. Changes in Fibrosis Stage (NASH CRN and Ishak Systems) (PP Population)

Figure S4. Change from Baseline to Year 1 *versus* Baseline Morphometric Quantitative Collagen, by NASH CRN Fibrosis Improvement Status at Year 1 (mITT Population)

#### IV. Supplementary Tables

Table S1. Use of Concomitant Medications During CENTAUR Study Year 1

Table S2. CENTAUR Study Objectives and Procedures

Table S3. Analysis of the Key Secondary Efficacy End Point, Improvement in Fibrosis by at Least One Stage and No Worsening of Steatohepatitis, by Liver Biopsy Length (mITT population)

Table S4. Change from Baseline in Liver Biopsy Steatosis, Lobular Inflammation, and Hepatocellular Ballooning at Year 1 (PP Population)

Table S5. Change from Baseline to Liver Biochemistry and Fasting Metabolic Parameters at Year 1 (Safety Population)

Table S6. Change from Baseline to Year 1 in Liver Fibrosis Indices in All Subjects (PP population) and by NASH CRN Fibrosis Improvement Status at Year 1 (mITT population)

Table S7. Incidence of Treatment-Emergent Adverse Events and Laboratory Abnormalities per Treatment Group

## V. References

## I. List of Investigators

### *Primary Investigators*

**USA:** Manal F. Abdelmalek, Saleh Alqahtani (original PI; new PI: Mark Sulkowski), Bashar Aqel, Hays Arnold, Luis Balart, Meena Bansal, Charles Barish, Bahri Bilir, Mario Chojkier, Hari Conjeevaram, James N. Cooper, Kathleen Corey, Michael Fallon (original PI; new PI: Moises Ilan Nevah Rubin), Juan Gallegos-Orozco, Robert Hardi, Stephen A. Harrison (original PI; new PI: Angelo Paredes), Maria Hernandez, Mark Edward Jonas, Zeid Kayali, Nyingi Kemmer, Kris V. Kowdley, Richard Krause, Jacob Lalezari, Rohit Loomba, Anthony Martinez, Craig McClain, Sam Moussa, John Phillips, Fred Poordad, Arun Sanyal, Nikunj Shah, Asma Siddique, Samuel Sigal (original PI; new PI: James Park), Brian Stanley Smith, Samuel Tarwater, Paul Thuluvath, Jane-Claire Williams, Ziad Younes, Donald Zogg; **Australia:** Peter Angus, Geoffrey Farrell, Alexander Hodge, Kate Muller (original PI; new PI: Alan Wigg), Richard Skoien, Edmund Tse; **Belgium:** David Cassiman, Sven Francque (National Coordinator), Nicolas Lanthier, Christophe Moreno; **France:** Jérôme Boursier, Jean-Pierre Bronowicki, Christophe Bureau, Victor De Ledinghen, Marianne Maynard, Vlad Ratziu (National Coordinator), Didier Samuel, Lawrence Serfaty; **Germany:** Munevver Demir, Johannes Kluwe, Anita Pathil-Warth, Ingolf Schiefke, Eckart Schott, Frank Tacke (National Coordinator), Florian van Boemmel, Till Wissniowski; **Hong Kong:** Vincent Wai-Sun Wong; **Italy:** Pietro Andreone, Antonio Craxi (National Coordinator), Silvia Fargion, Pietro Invernizzi (original PI; new PI: Marco Carbone); **Poland:** Maciej Jablkowski, Ewa Janczewska, Krzysztof Simon (National Coordinator); **Spain:** Pablo Bellot, Juan Caballeria (National Coordinator), Ainhoa Fernandez Yunqueira, Joan Genesca, German Soriano; **UK:** Guruprasad P. Aithal (National Coordinator), William Alazawi, Andrew Fowell.

## **II. Supplementary Methods: Study Objectives**

As previously discussed,(1) this study was designed to adequately assess the efficacy of cenicriviroc (CVC) treatment for fibrotic nonalcoholic steatohepatitis (NASH), based on previous phase 2 studies as well as contemporary phase 3 studies.

Since the time of protocol writing and study initiation but prior to database lock for the year 1 primary analysis, the definitions of the primary and key secondary efficacy end points were adapted to reflect the most recent recommendations from regulatory authorities at open forums and separately with the sponsor in the study's statistical analysis plan.(2) Consequently, the protocol and statistical analysis plan were amended (detailed below) to reflect the update in the definitions.

Please note that the CENTAUR study uses the same definitions for the resolution of NASH as in the PIVENS and FLINT studies, which are based on the definitions from Brunt and Kleiner.(3, 4)

### III. Supplementary Figures

**Figure S1. CENTAUR Study Efficacy End Points.\***

| Primary Efficacy End Point                                                                                                                                                                                                                                                                                                                                                 | Key Secondary Efficacy End Points                                                                                                                                                                                                    |
|----------------------------------------------------------------------------------------------------------------------------------------------------------------------------------------------------------------------------------------------------------------------------------------------------------------------------------------------------------------------------|--------------------------------------------------------------------------------------------------------------------------------------------------------------------------------------------------------------------------------------|
| <ul style="list-style-type: none"> <li>Hepatic histological improvement in NAS relative to screening biopsy (≥2-point improvement in NAS with ≥1-point reduction in either lobular inflammation or hepatocellular ballooning) and no worsening of fibrosis† at year 1</li> </ul>                                                                                           | <ul style="list-style-type: none"> <li>Complete resolution of NASH‡ and no worsening of fibrosis† at year 1</li> <li>Improvement in fibrosis by ≥1 stage (NASH CRN system) and no worsening of steatohepatitis§ at year 1</li> </ul> |
| Other Secondary Efficacy End Points                                                                                                                                                                                                                                                                                                                                        |                                                                                                                                                                                                                                      |
| <ul style="list-style-type: none"> <li>Complete resolution of NASH‡ and no worsening of fibrosis at year 2</li> </ul>                                                                                                                                                                                                                                                      |                                                                                                                                                                                                                                      |
| <ul style="list-style-type: none"> <li>Improvement in fibrosis by at least 1 stage (NASH CRN system) and no worsening of steatohepatitis§ at year 2</li> </ul>                                                                                                                                                                                                             |                                                                                                                                                                                                                                      |
| <ul style="list-style-type: none"> <li>Hepatic histological improvement in NAS at year 2 relative to screening biopsy (≥2-point drop in NAS with ≥1-point reduction in either lobular inflammation or hepatocellular ballooning) and no worsening of fibrosis at year 2</li> </ul>                                                                                         |                                                                                                                                                                                                                                      |
| <ul style="list-style-type: none"> <li>Changes in each of the categorical features of NAS (steatosis, lobular inflammation, hepatocellular ballooning) at years 1 and 2</li> </ul>                                                                                                                                                                                         |                                                                                                                                                                                                                                      |
| <ul style="list-style-type: none"> <li>Hepatic histological improvement in NAS relative to the screening biopsy using a modified definition of ≥2-point improvement in NAS with ≥1-point improvement in more than 1 category (steatosis, lobular inflammation, and hepatocellular ballooning) and no worsening of fibrosis stage† at years 1 and 2</li> </ul>              |                                                                                                                                                                                                                                      |
| <ul style="list-style-type: none"> <li>Resolution of NASH using a modified definition based on categorical features of NAS and defined as having no hepatocellular ballooning (grade 0) and minimal to no lobular inflammation (grade 1 or 0) and no worsening of fibrosis stage (worsening defined as progression of NASH CRN fibrosis stage) at years 1 and 2</li> </ul> |                                                                                                                                                                                                                                      |
| <ul style="list-style-type: none"> <li>Change in morphometric quantitative collagen on liver biopsy at years 1 and 2</li> </ul>                                                                                                                                                                                                                                            |                                                                                                                                                                                                                                      |
| <ul style="list-style-type: none"> <li>Change in hepatic tissue fibrogenic protein (α-SMA) at years 1 and 2</li> </ul>                                                                                                                                                                                                                                                     |                                                                                                                                                                                                                                      |
| <ul style="list-style-type: none"> <li>Change in morphometric fat content on liver biopsy at years 1 and 2</li> </ul>                                                                                                                                                                                                                                                      |                                                                                                                                                                                                                                      |
| <ul style="list-style-type: none"> <li>Change in histologic fibrosis stage (NASH CRN and Ishak systems) at years 1 and 2</li> </ul>                                                                                                                                                                                                                                        |                                                                                                                                                                                                                                      |
| <ul style="list-style-type: none"> <li>Change in portal inflammation grade on liver biopsy at years 1 and 2</li> </ul>                                                                                                                                                                                                                                                     |                                                                                                                                                                                                                                      |
| <ul style="list-style-type: none"> <li>Change from baseline in noninvasive markers of hepatic fibrosis (APRI, FIB-4, hyaluronic acid, FibroTest [FibroSure], NFS, and ELF) at months 3, 6, 12, 15, 18, and 24</li> </ul>                                                                                                                                                   |                                                                                                                                                                                                                                      |
| <ul style="list-style-type: none"> <li>Change from baseline in biomarkers of hepatocyte apoptosis (CK-18 caspase-cleaved [M30] and total [M65]) at months 3, 6, 12, 15, 18 and 24</li> </ul>                                                                                                                                                                               |                                                                                                                                                                                                                                      |
| <ul style="list-style-type: none"> <li>Change from baseline in liver parameters and fasting metabolic parameters at months 3, 6, 12, 15, 18, and 24</li> </ul>                                                                                                                                                                                                             |                                                                                                                                                                                                                                      |
| <ul style="list-style-type: none"> <li>Change from baseline in weight, BMI, waist circumference, waist–hip ratio, arm circumference, and tricep skinfold at months 3, 6, 12, 15, 18, and 24</li> </ul>                                                                                                                                                                     |                                                                                                                                                                                                                                      |
| Tertiary Efficacy End Points                                                                                                                                                                                                                                                                                                                                               |                                                                                                                                                                                                                                      |
| <ul style="list-style-type: none"> <li>Change from baseline in noninvasive liver imaging method (e.g. UTE, 2D-MRE, and ARFI) at months 6, 12, 18, and 24 (at sites where available)</li> </ul>                                                                                                                                                                             |                                                                                                                                                                                                                                      |

\*α-SMA denotes α-smooth muscle actin, APRI aspartate aminotransferase-to-platelet ratio index, ARFI acoustic radiation force impulse, BMI body mass index, CK-18 cytokeratin 18, CRN Clinical Research Network, ELF enhanced liver fibrosis, FIB-4 fibrosis-4, 2D-MRE 2-dimensional magnetic resonance elastography, NAS nonalcoholic fatty liver disease activity score, NASH nonalcoholic steatohepatitis, NFS nonalcoholic fatty liver disease fibrosis score, and UTE ultrasound transient elastography.

†Worsening defined as progression of NASH CRN fibrosis stage.

‡Histopathologic interpretation of no fatty liver disease or simple or isolated steatosis and no steatohepatitis.

§No worsening of lobular inflammation or hepatocellular ballooning grade.

**Figure S2. Planned Step-Down Approach Used for the Statistical Analysis of the CENTAUR Study Efficacy End Points.\***

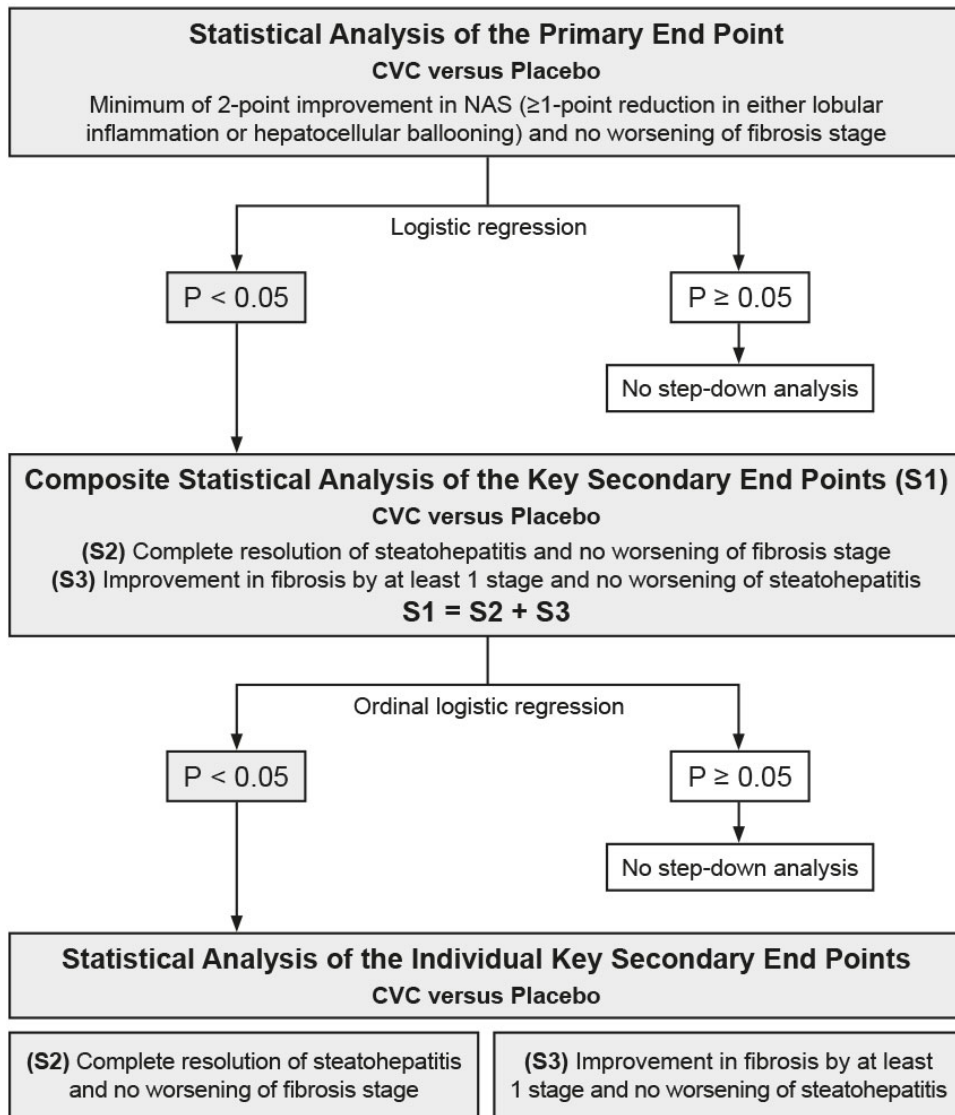

\*CVC denotes cenicriviroc, and NAS nonalcoholic fatty liver disease activity score.

**Figure S3. Changes in Fibrosis Stage (NASH CRN and Ishak Systems) (PP Population).\***

Panel A shows the proportion of subjects who improved, had no change in, or had worsening of fibrosis stage at year 1. Panel B shows the number of subjects with changes in the NASH CRN or Ishak fibrosis system at year 1.

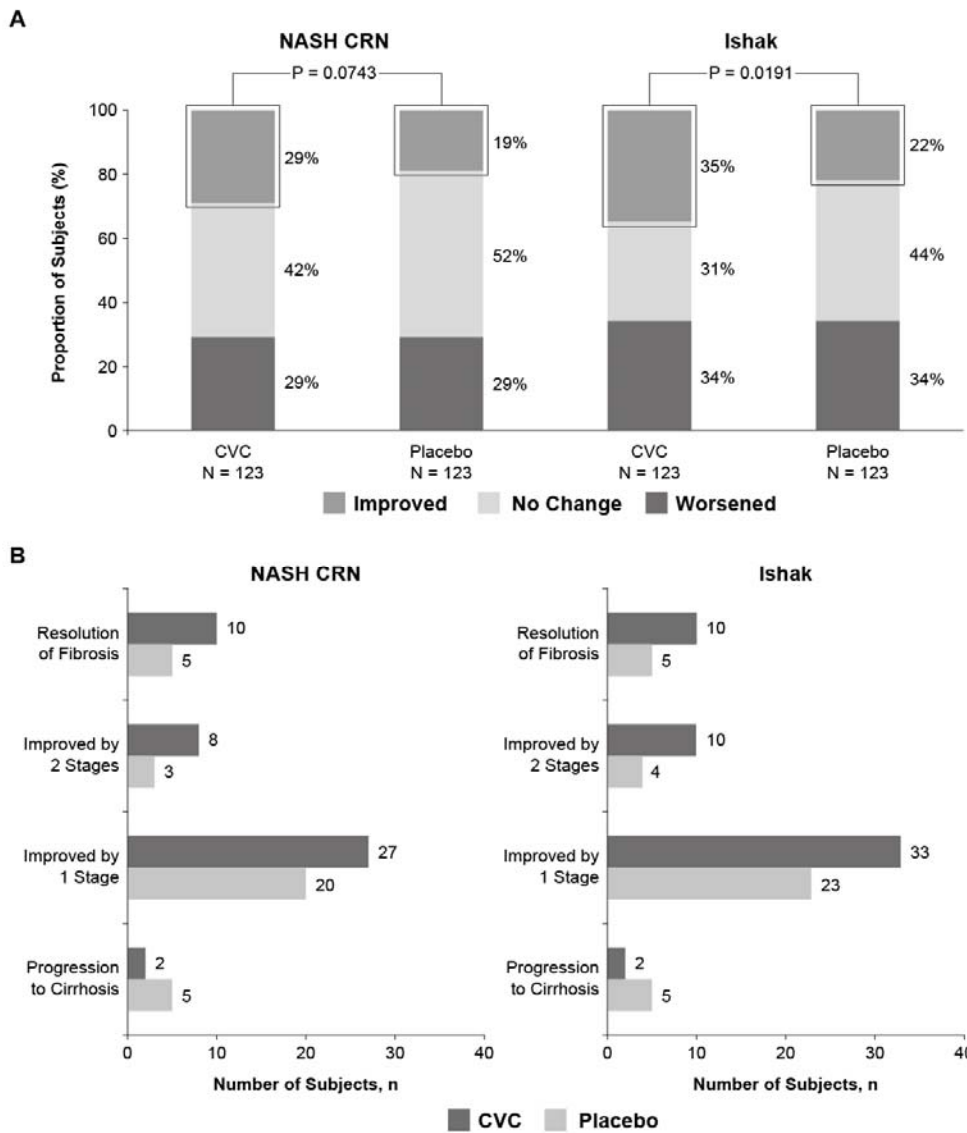

\*CVC denotes cenicriviroc, NASH CRN nonalcoholic steatohepatitis Clinical Research Network, and PP per protocol.

**Figure S4. Change from Baseline to Year 1 *versus* Baseline Morphometric Quantitative Collagen, by NASH CRN Fibrosis Improvement Status at Year 1 (mITT Population).\***

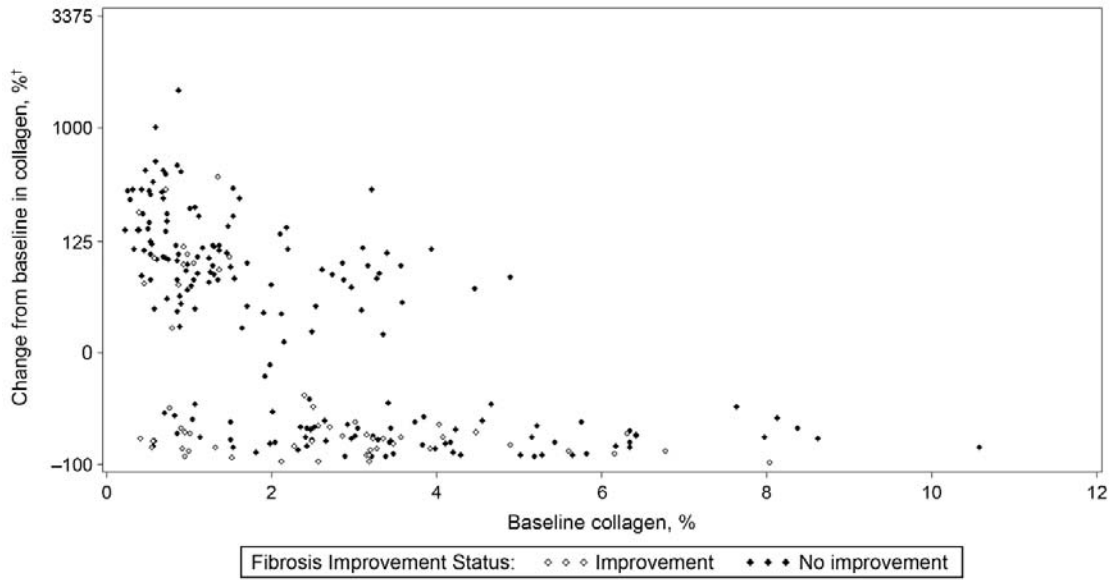

\*mITT denotes modified intent-to-treat, and NASH CRN nonalcoholic steatohepatitis Clinical Research Network.

†Vertical axis presented with cube root spacing.



#### IV. Supplementary Tables

**Table S1. Use of concomitant medications during CENTAUR Study Year 1**

|                                       | <b>HMG CoA<br/>reductase<br/>inhibitors</b> | <b>Biguanides</b> | <b>Angiotensin II<br/>inhibitors</b> | <b>Glucose<br/>lowering drugs<br/>excluding<br/>insulin</b> |
|---------------------------------------|---------------------------------------------|-------------------|--------------------------------------|-------------------------------------------------------------|
| <b>Used at any time during year 1</b> |                                             |                   |                                      |                                                             |
| CVC, %                                | 35.4                                        | 52.8              | 22.9                                 | 16.7                                                        |
| Placebo, %                            | 37.5                                        | 46.5              | 18.1                                 | 9.7                                                         |
| <b>New or changed during year 1</b>   |                                             |                   |                                      |                                                             |
| CVC, %                                | 11.8                                        | 9.7               | 5.6                                  | 9.0                                                         |
| Placebo, %                            | 9.0                                         | 14.6              | 2.8                                  | 6.3                                                         |

CVC, cenicriviroc; HMG CoA, hydroxymethylglutaryl CoA



|                                                                                                                                                                                                                                                                                                                                                                                             |  |   |  |   |
|---------------------------------------------------------------------------------------------------------------------------------------------------------------------------------------------------------------------------------------------------------------------------------------------------------------------------------------------------------------------------------------------|--|---|--|---|
| <ul style="list-style-type: none"> <li>Evaluate hepatic histological improvement in NAS relative to screening biopsy (2-point improvement in NAS with at least a 1-point reduction in either lobular inflammation or hepatocellular ballooning) and no worsening of fibrosis† at <b>year 2</b></li> </ul>                                                                                   |  |   |  | X |
| <ul style="list-style-type: none"> <li>Evaluate changes in each of the categorical features of NAS (steatosis, lobular inflammation, hepatocellular ballooning) at <b>years 1 and 2</b></li> </ul>                                                                                                                                                                                          |  | X |  | X |
| <ul style="list-style-type: none"> <li>Evaluate hepatic histological improvement in NAS relative to the screening biopsy (modified definition of 2-point improvement in NAS with at least a 1-point improvement in more than 1 category [steatosis, lobular inflammation, and hepatocellular ballooning]) and no worsening of fibrosis stage† at <b>years 1 and 2</b></li> </ul>            |  | X |  | X |
| <ul style="list-style-type: none"> <li>Evaluate resolution of NASH using a modified definition based on categorical features of NAS and defined as having no hepatocellular ballooning (grade 0) and minimal to no lobular inflammation (grade 1 or 0), and no worsening of fibrosis stage (worsening defined as progression of NASH CRN fibrosis stage) at <b>years 1 and 2</b></li> </ul> |  | X |  | X |
| <ul style="list-style-type: none"> <li>Evaluate the efficacy of CVC versus placebo in adult subjects with liver fibrosis as determined by change in morphometric quantitative collagen on liver biopsy at <b>years 1 and 2</b></li> </ul>                                                                                                                                                   |  | X |  | X |
| <ul style="list-style-type: none"> <li>Evaluate the change in histological fibrosis stage assessed using NASH CRN and Ishak systems at <b>years 1 and 2</b></li> </ul>                                                                                                                                                                                                                      |  | X |  | X |
| <ul style="list-style-type: none"> <li>Evaluate the change in hepatic stellate cell activation marker (α-SMA) at <b>years 1 and 2</b></li> </ul>                                                                                                                                                                                                                                            |  | X |  | X |

|                                                                                                                                                                                                           |   |   |   |   |   |   |
|-----------------------------------------------------------------------------------------------------------------------------------------------------------------------------------------------------------|---|---|---|---|---|---|
| <ul style="list-style-type: none"> <li>Evaluate the change in morphometric quantitative fat content on liver biopsy at <b>years 1 and 2</b></li> </ul>                                                    |   |   | X |   |   | X |
| <ul style="list-style-type: none"> <li>Evaluate the change in portal inflammation grade on liver biopsy at <b>years 1 and 2</b></li> </ul>                                                                |   |   | X |   |   | X |
| <ul style="list-style-type: none"> <li>Evaluate change from baseline in noninvasive scores and markers of hepatic fibrosis (APRI, FIB-4, hyaluronic acid, FibroTest [FibroSure], NFS, and ELF)</li> </ul> | X | X | X | X | X | X |
| <ul style="list-style-type: none"> <li>Evaluate the change from baseline in biomarkers of hepatocyte apoptosis, assessed using CK-18 caspase-cleaved and total</li> </ul>                                 | X | X | X | X | X | X |
| <ul style="list-style-type: none"> <li>Evaluate the change from baseline in liver biochemistry and fasting metabolite parameters</li> </ul>                                                               | X | X | X | X | X | X |
| <ul style="list-style-type: none"> <li>Change from baseline in weight, BMI, waist circumference, waist-hip ratio, arm circumference, and tricep skinfold</li> </ul>                                       | X | X | X | X | X | X |
| <b>Tertiary objectives</b>                                                                                                                                                                                |   |   |   |   |   |   |
| <ul style="list-style-type: none"> <li>Evaluate the change from baseline by noninvasive liver imaging method (e.g., UTE, 2D-MRE, and ARFI)</li> </ul>                                                     |   | X | X |   | X | X |
| <ul style="list-style-type: none"> <li>Change from baseline in pro-inflammatory cytokines and biomarkers of inflammation</li> </ul>                                                                       | X | X | X | X | X | X |
| <ul style="list-style-type: none"> <li>Change from baseline in eGFR</li> </ul>                                                                                                                            | X | X | X | X | X | X |
| <ul style="list-style-type: none"> <li>Change from baseline in biomarkers associated with bacterial translocation</li> </ul>                                                                              | X | X | X | X | X | X |

\* $\alpha$ -SMA denotes  $\alpha$ -smooth muscle actin, APRI aspartate aminotransferase-to-platelet ratio index, ARFI acoustic radiation force impulse, BMI body mass index, CK-18, cytokeratin 18; CRN Clinical Research Network, CVC cenicriviroc, eGFR estimated glomerular filtration rate, ELF enhanced liver fibrosis, FIB-4 fibrosis-4, 2D-MRE 2-dimensional magnetic resonance elastography, NAS nonalcoholic

fatty liver disease activity score, NASH nonalcoholic steatohepatitis, NFS nonalcoholic fatty liver disease fibrosis score, PK pharmacokinetics, and UTE ultrasound transient elastography.

†Worsening defined as progression of NASH CRN fibrosis stage.

‡Histopathologic interpretation of no fatty liver disease, or simple or isolated steatosis and no steatohepatitis.

§No worsening of lobular inflammation or hepatocellular ballooning grade.

¶Plasma samples for population PK analysis will be collected on day 1 (baseline) and months 0.5, 3, 6, 12, 15, 18, and 24.

||At sites where available.

**Table S3. Analysis of the Key Secondary Efficacy End Point, Improvement in Fibrosis by at Least One Stage and No Worsening of Steatohepatitis, by Liver Biopsy Length (mITT population).\***

| <b>Baseline biopsy length</b>    | <b>CVC 150 mg</b> | <b>Placebo</b>   | <b>OR and</b>        | <b>P value</b> |
|----------------------------------|-------------------|------------------|----------------------|----------------|
| <b>End point response, n (%)</b> | <b>(N = 126)</b>  | <b>(N = 144)</b> | <b>95% CI</b>        |                |
|                                  |                   |                  | <b>(CVC/Placebo)</b> |                |
| <b>Baseline biopsy length</b>    | N = 28            | N = 22           | 3.999 (0.754,        | 0.1035         |
| <b>&lt;15 mm</b>                 |                   |                  | 21.219)              |                |
| 1 = Yes                          | 8 (28.6)          | 2 (9.1)          |                      |                |
| 0 = No                           | 20 (71.4)         | 20 (90.9)        |                      |                |
| <b>Baseline biopsy length</b>    | N = 98            | N = 104          | 1.909 (0.897,        | 0.0934         |
| <b>≥15 mm</b>                    |                   |                  | 4.063)               |                |
| 1 = Yes                          | 21 (21.4)         | 13 (12.5)        |                      |                |
| 0 = No                           | 77 (78.6)         | 91 (87.5)        |                      |                |
| <b>Year 1 biopsy length</b>      | N = 23            | N = 27           | 0.737 (0.180,        | 0.6710         |
| <b>&lt;15 mm</b>                 |                   |                  | 3.016)               |                |
| 1 = Yes                          | 4 (17.4)          | 6 (22.2)         |                      |                |
| 0 = No                           | 19 (82.6)         | 21 (77.8)        |                      |                |
| <b>Year 1 biopsy length</b>      | N = 103           | N = 99           | 3.205 (1.412,        | 0.0054         |
| <b>≥15 mm</b>                    |                   |                  | 7.277)               |                |
| 1 = Yes                          | 25 (24.3)         | 9 (9.1)          |                      |                |
| 0 = No                           | 78 (75.7)         | 90 (90.9)        |                      |                |

\*CI denotes confidence interval, CVC cenicriviroc, mITT modified intent-to-treat, and OR odds ratio.

**Table S4. Change from Baseline in Liver Biopsy Steatosis, Lobular Inflammation, and Hepatocellular Ballooning at Year 1 (PP Population).\***

|                                   | <b>CVC 150 mg</b> |             |             | <b>Placebo</b>    |             |             |
|-----------------------------------|-------------------|-------------|-------------|-------------------|-------------|-------------|
|                                   | <b>(N = 123)†</b> |             |             | <b>(N = 123)†</b> |             |             |
|                                   | Improved          | No change   | Worsened    | Improved          | No change   | Worsened    |
| <b>Steatosis‡</b>                 |                   |             |             |                   |             |             |
| no.                               | 24                | 91          | 8           | 31                | 76          | 16          |
| <b>%</b>                          | <b>19.5</b>       | <b>74.0</b> | <b>6.5</b>  | <b>25.2</b>       | <b>61.8</b> | <b>13.0</b> |
| <b>Lobular inflammation§</b>      |                   |             |             |                   |             |             |
| no.                               | 39                | 54          | 30          | 34                | 61          | 28          |
| <b>%</b>                          | <b>31.7</b>       | <b>43.9</b> | <b>24.4</b> | <b>27.6</b>       | <b>49.6</b> | <b>22.8</b> |
| <b>Hepatocellular ballooning¶</b> |                   |             |             |                   |             |             |
| no.                               | 33                | 67          | 23          | 43                | 62          | 18          |
| <b>%</b>                          | <b>26.8</b>       | <b>54.5</b> | <b>18.7</b> | <b>35.0</b>       | <b>50.4</b> | <b>14.6</b> |

\*CVC denotes cenicriviroc, and PP per-protocol.

†Subjects without evaluable biopsy results at both baseline and year 1 are excluded.

‡Grade defined as 0=<5%, 1=5%–33%, 2=>33%–66%, 3=>66%.

§Grade defined as 0=no foci, 1=<2 foci/200x, 2=2–4 foci/200x, 3=>4 foci/200x.

¶Grade defined as 0=none, 1=few balloon cells, 2=many cells/prominent ballooning.



**Table S5. Change from Baseline to Liver Biochemistry and Fasting Metabolic Parameters at Year 1 (Safety Population).\***

|                | <b>CVC 150 mg</b> |                  |                 | <b>Placebo</b>   |                   |                   |
|----------------|-------------------|------------------|-----------------|------------------|-------------------|-------------------|
|                | <b>(N = 144)</b>  |                  |                 | <b>(N = 144)</b> |                   |                   |
|                | Baseline          | Year 1           | Change          | Baseline         | Year 1            | Change            |
| <b>ALP</b>     |                   |                  |                 |                  |                   |                   |
| no.            | 123               | 123              | 123             | 124              | 124               | 124               |
| Mean (SD), U/L | 78.25<br>(20.95)  | 79.22<br>(23.27) | 0.97<br>(15.57) | 81.44<br>(29.02) | 96.96<br>(121.03) | 15.52<br>(116.81) |
| <b>ALT</b>     |                   |                  |                 |                  |                   |                   |
| no.            | 123               | 123              | 123             | 124              | 124               | 124               |
| Mean (SD), U/L | 60.37<br>(34.32)  | 67.15<br>(46.68) | 6.78<br>(37.28) | 64.12<br>(36.09) | 64.87<br>(55.03)  | 0.75<br>(49.69)   |
| <b>Albumin</b> |                   |                  |                 |                  |                   |                   |
| no.            | 123               | 123              | 123             | 124              | 124               | 124               |
| Mean (SD), g/L | 44.33<br>(3.74)   | 43.59<br>(3.89)  | -0.74<br>(3.01) | 44.40<br>(3.98)  | 43.71<br>(3.78)   | -0.69<br>(2.59)   |
| <b>AST</b>     |                   |                  |                 |                  |                   |                   |
| no.            | 122               | 122              | 122             | 123              | 123               | 123               |
| Mean (SD), U/L | 43.29<br>(22.39)  | 48.34<br>(31.26) | 5.05<br>(27.91) | 48.06<br>(23.07) | 50.85<br>(41.34)  | 2.80<br>(39.65)   |

**Direct bilirubin**

|                              |                |                |                |                |                |                |
|------------------------------|----------------|----------------|----------------|----------------|----------------|----------------|
| no.                          | 122            | 122            | 122            | 123            | 123            | 123            |
| Mean (SD), $\mu\text{mol/L}$ | 2.64<br>(1.91) | 2.76<br>(1.87) | 0.12<br>(0.93) | 2.73<br>(1.55) | 3.15<br>(4.65) | 0.42<br>(4.27) |

**Total bilirubin**

|                              |                |                |                 |                |                |                |
|------------------------------|----------------|----------------|-----------------|----------------|----------------|----------------|
| no.                          | 123            | 123            | 123             | 124            | 124            | 124            |
| Mean (SD), $\mu\text{mol/L}$ | 9.02<br>(9.69) | 8.94<br>(7.20) | -0.09<br>(5.33) | 8.46<br>(4.80) | 8.53<br>(6.79) | 0.07<br>(5.72) |

**GGT**

|                |                  |                  |                 |                  |                   |                   |
|----------------|------------------|------------------|-----------------|------------------|-------------------|-------------------|
| no.            | 123              | 123              | 123             | 124              | 124               | 124               |
| Mean (SD), U/L | 68.94<br>(81.76) | 70.79<br>(94.93) | 1.85<br>(34.75) | 66.03<br>(44.45) | 80.99<br>(190.51) | 14.96<br>(190.21) |

**Total cholesterol**

|                   |                |                |                 |                |                |                |
|-------------------|----------------|----------------|-----------------|----------------|----------------|----------------|
| no.               | 123            | 123            | 123             | 124            | 124            | 124            |
| Mean (SD), mmol/L | 4.95<br>(1.12) | 4.93<br>(1.19) | -0.03<br>(0.83) | 4.80<br>(1.24) | 4.85<br>(1.15) | 0.04<br>(0.93) |

**HDL cholesterol**

|                   |                |                |                 |                |                |                |
|-------------------|----------------|----------------|-----------------|----------------|----------------|----------------|
| no.               | 120            | 120            | 120             | 123            | 123            | 123            |
| Mean (SD), mmol/L | 1.08<br>(0.34) | 1.08<br>(0.34) | -0.01<br>(0.20) | 1.06<br>(0.36) | 1.08<br>(0.35) | 0.02<br>(0.23) |

**LDL cholesterol**

|                   |                |                |                |                |                |                 |
|-------------------|----------------|----------------|----------------|----------------|----------------|-----------------|
| no.               | 119            | 119            | 119            | 123            | 123            | 123             |
| Mean (SD), mmol/L | 3.13<br>(0.95) | 3.13<br>(1.02) | 0.01<br>(0.70) | 3.03<br>(1.12) | 2.97<br>(1.00) | -0.07<br>(0.74) |

**VLDL cholesterol**

|                   |                |                |                 |                |                |                |
|-------------------|----------------|----------------|-----------------|----------------|----------------|----------------|
| no.               | 120            | 120            | 120             | 124            | 124            | 124            |
| Mean (SD), mmol/L | 0.96<br>(0.83) | 0.91<br>(0.63) | -0.06<br>(0.76) | 0.90<br>(0.58) | 1.00<br>(0.94) | 0.10<br>(0.73) |

**Triglycerides**

|                   |                |                |                 |                |                |                |
|-------------------|----------------|----------------|-----------------|----------------|----------------|----------------|
| no.               | 123            | 123            | 123             | 124            | 124            | 124            |
| Mean (SD), mmol/L | 2.08<br>(1.79) | 1.98<br>(1.37) | -0.10<br>(1.67) | 1.95<br>(1.27) | 2.17<br>(2.05) | 0.22<br>(1.59) |

**Fasting glucose**

|                   |                |                |                |                |                |                |
|-------------------|----------------|----------------|----------------|----------------|----------------|----------------|
| no.               | 116            | 116            | 116            | 115            | 115            | 115            |
| Mean (SD), mmol/L | 6.93<br>(2.23) | 6.96<br>(2.38) | 0.03<br>(1.89) | 6.48<br>(2.09) | 6.82<br>(2.05) | 0.34<br>(2.05) |

**Insulin**

|                  |                  |                  |                 |                  |                  |                 |
|------------------|------------------|------------------|-----------------|------------------|------------------|-----------------|
| no.              | 119              | 119              | 119             | 120              | 120              | 120             |
| Mean (SD), mIU/L | 27.07<br>(21.15) | 27.65<br>(22.64) | 0.59<br>(26.49) | 29.35<br>(25.85) | 33.18<br>(34.33) | 3.82<br>(26.85) |

**HOMA-IR**

|     |     |     |     |     |     |     |
|-----|-----|-----|-----|-----|-----|-----|
| no. | 110 | 110 | 110 | 110 | 110 | 110 |
|-----|-----|-----|-----|-----|-----|-----|

|           |                |                |                 |                 |                  |                 |
|-----------|----------------|----------------|-----------------|-----------------|------------------|-----------------|
| Mean (SD) | 8.46<br>(8.21) | 8.00<br>(5.79) | -0.46<br>(8.73) | 9.56<br>(13.21) | 10.54<br>(12.79) | 0.98<br>(13.37) |
|-----------|----------------|----------------|-----------------|-----------------|------------------|-----------------|

---

**Non-esterified fatty acid**

|                   |                |                |                 |                |                |                 |
|-------------------|----------------|----------------|-----------------|----------------|----------------|-----------------|
| no.               | 114            | 114            | 114             | 118            | 118            | 118             |
| Mean (SD), mmol/L | 0.58<br>(0.23) | 0.57<br>(0.25) | -0.01<br>(0.26) | 0.61<br>(0.24) | 0.56<br>(0.23) | -0.05<br>(0.27) |

---

**Adipose tissue insulin resistance**

|           |                 |                 |                 |                  |                  |                 |
|-----------|-----------------|-----------------|-----------------|------------------|------------------|-----------------|
| no.       | 113             | 113             | 113             | 118              | 118              | 118             |
| Mean (SD) | 14.04<br>(8.44) | 14.37<br>(9.72) | 0.33<br>(10.33) | 16.33<br>(12.78) | 16.78<br>(14.22) | 0.45<br>(14.01) |

---

**HbA1c**

|              |                |                |                 |                |                |                |
|--------------|----------------|----------------|-----------------|----------------|----------------|----------------|
| no.          | 121            | 121            | 121             | 122            | 122            | 122            |
| Mean (SD), % | 6.71<br>(1.35) | 6.66<br>(1.42) | -0.05<br>(0.87) | 6.37<br>(1.10) | 6.45<br>(1.16) | 0.08<br>(0.78) |

---

**Adiponectin**

|                  |                |                |                 |                |                |                 |
|------------------|----------------|----------------|-----------------|----------------|----------------|-----------------|
| no.              | 119            | 119            | 119             | 121            | 121            | 121             |
| Mean (SD), µg/mL | 4.83<br>(2.85) | 4.25<br>(2.87) | -0.59<br>(1.58) | 4.36<br>(2.90) | 4.03<br>(2.61) | -0.33<br>(1.42) |

---

**Resistin**

|     |     |     |     |     |     |     |
|-----|-----|-----|-----|-----|-----|-----|
| no. | 122 | 122 | 122 | 121 | 121 | 121 |
|-----|-----|-----|-----|-----|-----|-----|

|                 |        |        |        |        |        |        |
|-----------------|--------|--------|--------|--------|--------|--------|
| Mean (SD), µg/L | 11.63  | 10.08  | -1.55  | 11.22  | 10.58  | -0.64  |
|                 | (5.62) | (5.00) | (3.46) | (5.70) | (5.01) | (2.53) |

---

\*ALP denotes alkaline phosphatase, ALT alanine aminotransferase, AST aspartate aminotransferase, CVC cenicriviroc, GGT gamma-glutamyl transferase, HbA1c hemoglobin A1c, HDL high-density lipoprotein, HOMA-IR homeostatic model assessment of insulin resistance, LDL low-density lipoprotein, SD standard deviation, VLDL very-low-density lipoprotein.

**Table S6. Change from Baseline to Year 1 in Liver Fibrosis Indices in All Subjects (PP population) and by NASH CRN Fibrosis Improvement Status at Year 1 (mITT population).\***

|                                  | <b>CVC 150 mg</b> |         |               | <b>Placebo</b>   |         |         |
|----------------------------------|-------------------|---------|---------------|------------------|---------|---------|
|                                  | <b>(N = 144)</b>  |         |               | <b>(N = 143)</b> |         |         |
|                                  | Baseline          | Year 1  | Change        | Baseline         | Year 1  | Change  |
| <b>NFS</b>                       |                   |         |               |                  |         |         |
| <b>All subjects</b>              |                   |         |               |                  |         |         |
| no.                              | 107               | 107     | 107           | 109              | 109     | 109     |
| Median (min, max)                | -0.942            | -0.783  | 0.153         | -1.223           | -1.190  | 0.102   |
|                                  | (-4.55,           | (-4.19, | (-1.35,       | (-4.81,          | (-4.27, | (-1.74, |
|                                  | 1.27)             | 2.25)   | 1.43)         | 2.46)            | 2.34)   | 1.37)   |
| 95% CI for difference            |                   |         | (-0.10, 0.17) |                  |         |         |
| in change from                   |                   |         |               |                  |         |         |
| baseline                         |                   |         |               |                  |         |         |
| (CVC 150 mg –                    |                   |         |               |                  |         |         |
| placebo)                         |                   |         |               |                  |         |         |
| <b>Subjects with improvement</b> |                   |         |               |                  |         |         |
| no.                              | 31                | 31      | 31            | 22               | 22      | 22      |
| Mean (SD)                        | -1.28             | -1.24   | 0.05          | -1.26            | -1.24   | 0.02    |
|                                  | (1.24)            | (1.21)  | (0.52)        | (1.46)           | (1.61)  | (0.64)  |

95% CI for difference (−0.29, 0.35)  
 in change from  
 baseline  
 (CVC 150 mg –  
 placebo)

**Subjects without  
 improvement**

|           |                 |                 |                |                 |                 |                |
|-----------|-----------------|-----------------|----------------|-----------------|-----------------|----------------|
| no.       | 76              | 76              | 76             | 90              | 90              | 90             |
| Mean (SD) | −0.99<br>(1.09) | −0.80<br>(1.21) | 0.19<br>(0.49) | −1.13<br>(1.48) | −0.99<br>(1.41) | 0.15<br>(0.48) |

95% CI for difference (−0.10, 0.19)  
 in change from  
 baseline  
 (CVC 150 mg –  
 placebo)

---

**FIB-4**

**All subjects**

|                   |                          |                          |                           |                          |                          |                           |
|-------------------|--------------------------|--------------------------|---------------------------|--------------------------|--------------------------|---------------------------|
| no.               | 114                      | 114                      | 114                       | 112                      | 112                      | 112                       |
| Median (min, max) | 1.239<br>(0.38,<br>4.20) | 1.375<br>(0.42,<br>5.26) | 0.080<br>(−1.81,<br>2.38) | 1.303<br>(0.40,<br>4.14) | 1.242<br>(0.36,<br>5.32) | 0.006<br>(−1.18,<br>3.11) |

95% CI for difference (-0.12, 0.19)  
 in change from  
 baseline  
 (CVC 150 mg –  
 placebo)

**Subjects with  
 improvement**

|           |                |                |                |                |                |                 |
|-----------|----------------|----------------|----------------|----------------|----------------|-----------------|
| no.       | 31             | 31             | 31             | 23             | 23             | 23              |
| Mean (SD) | 1.27<br>(0.59) | 1.29<br>(0.63) | 0.02<br>(0.41) | 1.31<br>(0.63) | 1.17<br>(0.60) | -0.14<br>(0.49) |

95% CI for difference (-0.09, 0.41)  
 in change from  
 baseline  
 (CVC 150 mg –  
 placebo)

**Subjects without  
 improvement**

|           |                |                |                |                |                |                |
|-----------|----------------|----------------|----------------|----------------|----------------|----------------|
| no.       | 83             | 83             | 83             | 92             | 92             | 92             |
| Mean (SD) | 1.44<br>(0.72) | 1.61<br>(0.82) | 0.16<br>(0.54) | 1.55<br>(0.76) | 1.72<br>(1.05) | 0.17<br>(0.73) |



95% CI for difference (-0.20, 0.18)  
 in change from  
 baseline  
 (CVC 150 mg –  
 placebo)

---

**APRI****All subjects**

|                   |                 |                 |                  |                 |                 |                  |
|-------------------|-----------------|-----------------|------------------|-----------------|-----------------|------------------|
| no.               | 114             | 114             | 114              | 112             | 112             | 112              |
| Median (min, max) | 0.470           | 0.539           | 0.024            | 0.568           | 0.538           | -0.031           |
|                   | (0.20,<br>3.12) | (0.15,<br>3.45) | (-1.30,<br>1.49) | (0.15,<br>2.26) | (0.13,<br>3.71) | (-0.82,<br>3.46) |

95% CI for difference (-0.06, 0.17)  
 in change from  
 baseline  
 (CVC 150 mg –  
 placebo)

**Subjects with  
improvement**

|           |        |        |        |        |        |        |
|-----------|--------|--------|--------|--------|--------|--------|
| no.       | 31     | 31     | 31     | 23     | 23     | 23     |
| Mean (SD) | 0.52   | 0.57   | 0.05   | 0.51   | 0.42   | -0.09  |
|           | (0.29) | (0.49) | (0.41) | (0.26) | (0.26) | (0.26) |

95% CI for difference (-0.05, 0.34)  
 in change from  
 baseline  
 (CVC 150 mg –  
 placebo)

**Subjects without  
 improvement**

|           |                |                |                |                |                |                |
|-----------|----------------|----------------|----------------|----------------|----------------|----------------|
| no.       | 83             | 83             | 83             | 92             | 92             | 92             |
| Mean (SD) | 0.61<br>(0.43) | 0.72<br>(0.50) | 0.11<br>(0.38) | 0.70<br>(0.41) | 0.81<br>(0.71) | 0.11<br>(0.61) |

95% CI for difference (-0.15, 0.16)  
 in change from  
 baseline  
 (CVC 150 mg –  
 placebo)

---

**ELF**

**All subjects**

|                   |                            |                            |                           |                            |                            |                            |
|-------------------|----------------------------|----------------------------|---------------------------|----------------------------|----------------------------|----------------------------|
| no.               | 115                        | 115                        | 115                       | 109                        | 109                        | 109                        |
| Median (min, max) | -0.892<br>(-2.70,<br>1.27) | -0.828<br>(-2.50,<br>1.08) | 0.023<br>(-1.98,<br>1.65) | -0.893<br>(-2.20,<br>1.62) | -1.003<br>(-2.53,<br>2.07) | -0.113<br>(-1.21,<br>1.60) |

95% CI for difference  
 in change from  
 baseline  
 (CVC 150 mg –  
 placebo)

(-0.05, 0.25)

**Subjects with  
 improvement**

|           |                 |                 |                 |                 |                 |                 |
|-----------|-----------------|-----------------|-----------------|-----------------|-----------------|-----------------|
| no.       | 33              | 33              | 33              | 23              | 23              | 23              |
| Mean (SD) | -1.06<br>(0.65) | -1.10<br>(0.60) | -0.04<br>(0.66) | -1.10<br>(0.73) | -1.12<br>(0.68) | -0.02<br>(0.44) |

95% CI for difference  
 in change from  
 baseline  
 (CVC 150 mg –  
 placebo)

(-0.34, 0.29)

**Subjects without  
 improvement**

|           |                 |                 |                |                 |                 |                 |
|-----------|-----------------|-----------------|----------------|-----------------|-----------------|-----------------|
| no.       | 82              | 82              | 82             | 89              | 89              | 89              |
| Mean (SD) | -0.72<br>(0.73) | -0.66<br>(0.76) | 0.06<br>(0.53) | -0.74<br>(0.73) | -0.81<br>(0.84) | -0.08<br>(0.59) |

95% CI for difference (-0.04, 0.30)  
in change from  
baseline  
(CVC 150 mg –  
placebo)

---

\*APRI denotes aspartate aminotransferase-to-platelet ratio index, CI confidence intervals, ELF enhanced liver fibrosis, FIB-4 fibrosis-4, mITT modified intent-to-treat, NFS nonalcoholic fatty liver disease fibrosis score, PP per protocol, and SD standard deviation.

**Table S7. Incidence of Treatment-Emergent Adverse Events and Laboratory Abnormalities per Treatment Group**

| no. (%)                                                                                                              | CVC 150 mg<br>(N = 144) | Placebo<br>(N = 144) |
|----------------------------------------------------------------------------------------------------------------------|-------------------------|----------------------|
| Drug-related TEAEs <sup>a</sup>                                                                                      | 61 (42.4)               | 54 (37.5)            |
| Mild (grade 1)                                                                                                       | 29 (20.1)               | 34 (23.6)            |
| Moderate (grade 2)                                                                                                   | 20 (13.9)               | 11 (7.6)             |
| Severe (grade 3)                                                                                                     | 12 (8.3)                | 9 (6.3)              |
| Life-threatening (grade 4)                                                                                           | 0 (0)                   | 0 (0)                |
| Drug-related, clinical TEAEs of grade $\geq 2$ severity observed in $\geq 2\%$ of subjects                           |                         |                      |
| Fatigue                                                                                                              | 4 (2.8)                 | 1 (0.7)              |
| Diarrhea                                                                                                             | 3 (2.1)                 | 1 (0.7)              |
| Headache                                                                                                             | 2 (1.4)                 | 5 (3.5)              |
| AEs leading to discontinuation                                                                                       |                         |                      |
| Serious adverse events <sup>b</sup>                                                                                  | 16 (11.1)               | 10 (6.9)             |
| Deaths                                                                                                               | 0 (0)                   | 0 (0)                |
| <b>Grade 3 and 4 abnormal clinical laboratory results (<math>\geq 2\%</math> of subjects in any treatment group)</b> |                         |                      |
| Fasting glucose                                                                                                      |                         |                      |
| Grade 3: $>250\text{--}500$ mg/dL                                                                                    | 17 (11.9)               | 13 (9.2)             |
| Grade 4: $>500$ mg/dL                                                                                                | ... <sup>c</sup>        | ... <sup>c</sup>     |
| ALT                                                                                                                  |                         |                      |
| Grade 3: $>5.0\text{--}20.0 \times$ ULN                                                                              | 17 (11.8)               | 17 (11.8)            |

|                                                          |                  |                  |
|----------------------------------------------------------|------------------|------------------|
| Grade 4: >20.0 × ULN                                     | ... <sup>c</sup> | ... <sup>c</sup> |
| <hr/>                                                    |                  |                  |
| AST                                                      |                  |                  |
| Grade 3: >5.0–20.0 × ULN                                 | 7 (4.9)          | 10 (6.9)         |
| Grade 4: >20.0 × ULN                                     | ... <sup>c</sup> | ... <sup>c</sup> |
| <hr/>                                                    |                  |                  |
| APT/PTT                                                  |                  |                  |
| Grade 3: >2.5 × ULN                                      | 4 (2.8)          | 2 (1.4)          |
| <hr/>                                                    |                  |                  |
| Triglycerides                                            |                  |                  |
| Grade 3: >500–1000 mg/dL                                 | 5 (3.5)          | 7 (4.9)          |
| Grade 4: >1000 mg/dL                                     | 3 (2.1)          | 3 (2.1)          |
| <hr/>                                                    |                  |                  |
| GGT                                                      |                  |                  |
| Grade 3: >5.0–20.0 × ULN                                 | 8 (5.6)          | 6 (4.2)          |
| Grade 4: >20.0 × ULN                                     | 1 (0.7)          | 1 (0.7)          |
| <hr/>                                                    |                  |                  |
| Creatine kinase                                          |                  |                  |
| Grade 3: >5.0–10.0 × ULN                                 | 6 (4.2)          | 7 (4.9)          |
| Grade 4: >10.0 × ULN                                     | 2 (1.4)          | 2 (1.4)          |
| <hr/>                                                    |                  |                  |
| Uric acid                                                |                  |                  |
| Grade 3: (ULN – 10 mg/dL; ULN – 0.59 mol/L) <sup>d</sup> | 9 (6.3)          | 9 (6.3)          |
| Grade 4: >10 mg/dL                                       | 11 (7.6)         | 6 (4.2)          |
| <hr/>                                                    |                  |                  |
| Amylase                                                  |                  |                  |
| Grade 3: >2.0–5.0 × ULN                                  | 6 (4.2)          | 1 (0.7)          |
| Grade 4: >5.0 × ULN                                      | ... <sup>c</sup> | ... <sup>c</sup> |
| <hr/>                                                    |                  |                  |
| Phosphorus                                               |                  |                  |
| Grade 3: <2.0–1.0 mg/dL                                  | 5 (3.5)          | 2 (1.4)          |

|                                        |                  |                  |
|----------------------------------------|------------------|------------------|
| Grade 4: <1.0 mg/dL                    | ... <sup>c</sup> | ... <sup>c</sup> |
| Absolute neutrophil                    |                  |                  |
| Grade 3: <1.0–0.5 × 10 <sup>9</sup> /L | 2 (1.4)          | 3 (2.1)          |
| Grade 4: <0.5 × 10 <sup>9</sup> /L     | 2 (1.4)          | 1 (0.7)          |

AE, adverse event; ALT, alanine aminotransferase; APT, activated partial thromboplastin;

AST, aspartate aminotransferase; CVC, cenicriviroc; GGT, gamma-glutamyl transferase; PTT, partial thromboplastin time; TEAE, treatment-emergent adverse event; ULN, upper limit of normal.

<sup>a</sup>An AE was considered related, as assessed by the investigator, if a temporal relationship between AE onset and administration of study drug existed, which could be readily explained by the subject's clinical state or by concomitant therapy.

<sup>b</sup>All treatment-emergent serious adverse events but one (grade 2 arrhythmia; subject remained on blinded treatment) were considered not related to treatment.

<sup>c</sup>One or more groups had zero cases; to maintain the blind, data that could be traced to an individual subject were omitted.

<sup>d</sup>With physiological consequences.

## V. References

1. Friedman SL, Sanyal A, Goodman Z, Lefebvre E, Gottwald M, Fischer L, et al. Efficacy and safety study of cenicriviroc for the treatment of non-alcoholic steatohepatitis in adult subjects with liver fibrosis: CENTAUR Phase 2b study design. *Contemp Clin Trials* 2016;47:356-365.
2. Dimick-Santos L. Endpoints and populations and trial designs for clinical trials in NASH indications. Presented at The Liver Forum, 12 November 2015, San Francisco, CA, USA.
3. Neuschwander-Tetri BA, Loomba R, Sanyal AJ, Lavine JE, Van Natta ML, Abdelmalek MF, et al. Farnesoid X nuclear receptor ligand obeticholic acid for non-cirrhotic, non-alcoholic steatohepatitis (FLINT): a multicentre, randomised, placebo-controlled trial. *Lancet* 2015;385:956-965.
4. Sanyal AJ, Chalasani N, Kowdley KV, McCullough A, Diehl AM, Bass NM, et al. Pioglitazone, vitamin E, or placebo for nonalcoholic steatohepatitis. *N Engl J Med* 2010;362:1675-1685.
